# Supplementary material
Source: PubMed Central journal article supplement (PMC10541472)
Supplement: mmc1.pdf [file mmc1.pdf]

**Biophysical Journal, Volume 122**

**Supplemental information**

**Rho activation drives luminal collapse and eversion in epithelial acini**

**Vani Narayanan, Purboja Purkayastha, Bo Yu, Kavya Pendyala, Sasanka Chukkapalli, Jolene I. Cabe, Richard B. Dickinson, Daniel E. Conway, and Tanmay P. Lele**

## Supplementary Figures

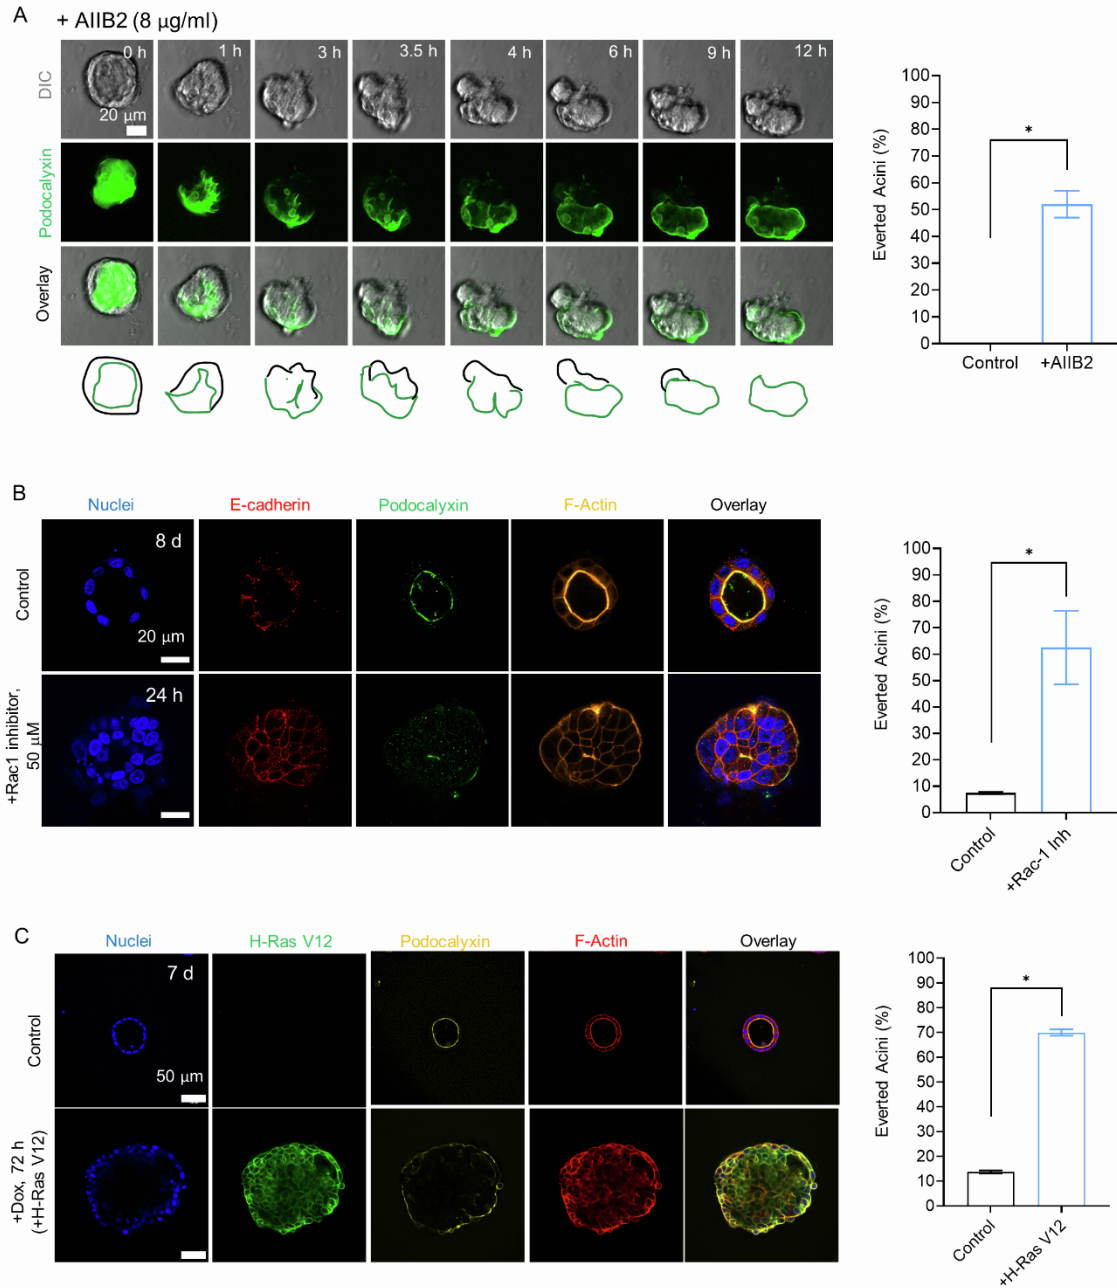

**Fig. S1.** (A) Time-lapse differential interference contrast (DIC) microscopy images and fluorescent GFP-podocalyxin images (GFP) of a 7-day old acinus treated with AIB2 ( $\beta$ -1 integrin function blocking antibody). 8  $\mu\text{g/ml}$  AIB2 was added at T = 0 h (Movie 11). About 50% of inhibitor-treated acini everted over 12 hours. Data is representative of total of 65 control acini and 132 AIB2 treated acini from 3 independent experiments. Error bars are SEM, \* $p < 0.05$  by Student's T test. Scale bar: 20 $\mu\text{m}$  (B) Percentage of everted MDCK II acini with and without Rac1 inhibitor (Rac1 inh, 50 $\mu\text{M}$ ) treatment on day 7 of acinar

morphogenesis, for 24 hours. About 60% of inhibitor-treated acini everted over 24 hours. Data is representative of a total of 218 acini (untreated control) and 250 acini (Rac1 inh, 24h) over 2 independent experiments (\*p < 0.05, Student t-test). Scale bar: 20 $\mu$ m (C) MDCK cells expressing doxycycline-inducible GFP H-Ras V12 were grown in Matrigel for 7 days. Doxycycline was added to the 7-day old acinus at T=0 to induce GFP H-Ras V12 expression, for 72 hours. About 70% of doxycycline induced acini everted after 72 hours. Data is representative of 60 acini per condition from 3 independent experiments. Error bars are SEM, \*p<0.05 by Student's T test. Scale bar: 50 $\mu$ m

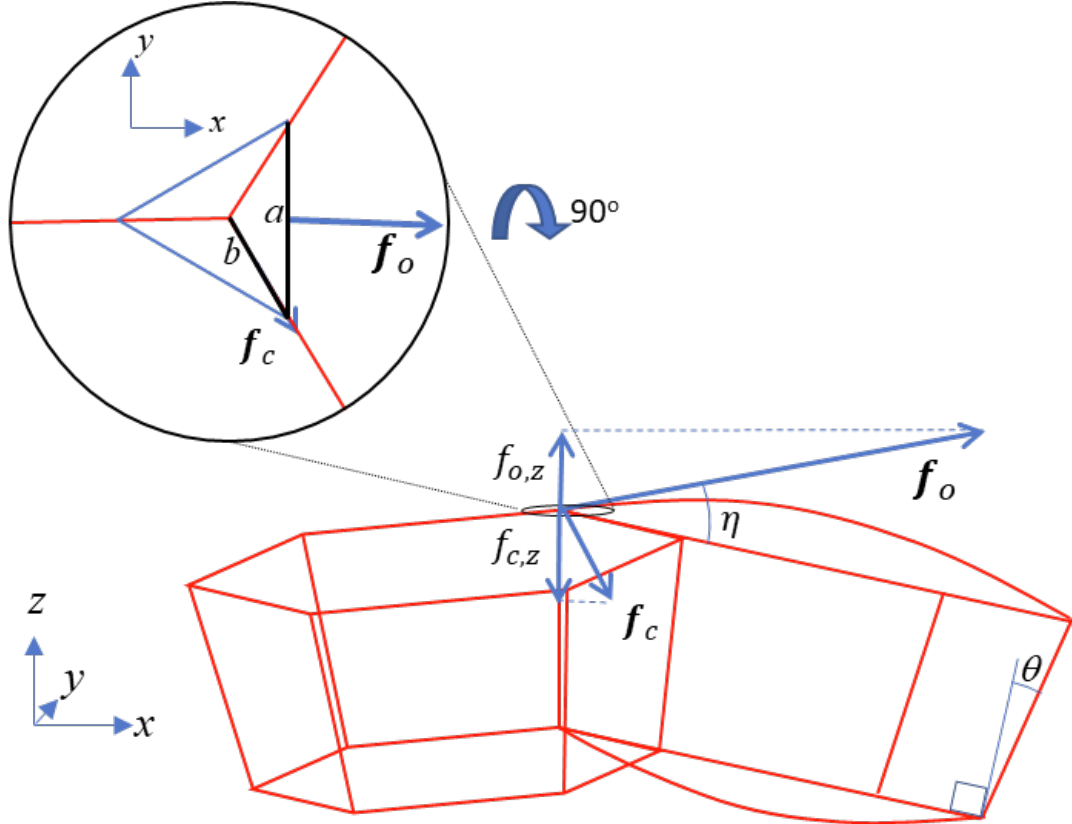

**Figure S2** – Force balance at the basal junction between three identical adjacent hexagonal cells. Consider the forces on a small equilateral triangular prism enclosing the junction point. Due to the surface tension,  $\tau_o$ , each basal cell surface exerts a force  $\mathbf{f}_o$  directed tangentially to the surface at the junction point. In the frame of reference shown, the z-component in the limit of small  $a$  is  $f_{o,z} = a\tau_o \sin(\eta - \theta) + O(a^2)$ , where  $\eta$  is the contact angle and  $\theta$  is the acinus angular change from the cell center to the junction point. Pressure forces are also  $O(a^2)$ . The z-component for the lateral-face surface tension,  $\tau_c$ , along the segment  $b$  is  $f_{c,z} = -\frac{a}{\sqrt{3}}\tau_c$ , noting  $b = \frac{a}{\sqrt{3}}$ . Dividing by  $a$  and taking  $a \rightarrow 0$  yields the force balance at the three-cell junction,  $\frac{\tau_c}{\sqrt{3}} = \tau_o \sin(\eta - \theta)$ . An identical derivation on the apical surface with surface tension,  $\tau_i$ , yields  $\frac{\tau_c}{\sqrt{3}} = \tau_i \sin(\eta + \theta)$ .

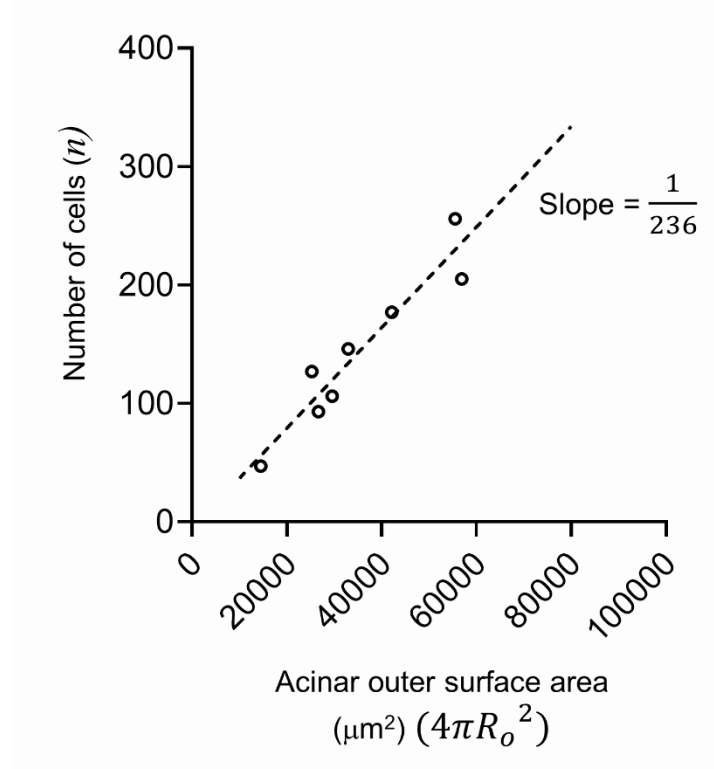

**Fig. S3.** Experimentally determined relationship between number of cells in acini ( $n$ ) and acinar outer radii ( $R_o$ ). Data shows  $n$  is directly proportional to  $R_o^2$ . The fitted line was obtained from measured values of  $n$  and outer surface areas ( $4\pi R_o^2$ ) of 8 acini with a single lumen.

## Movie Legends

**Movie 1.** Live imaging of MDCK acinus expressing GFP-podocalyxin formed over 10 days of three-dimensional culture. At time T = 0 h, the acinus was treated with Rho activator II. Scale bar, 20  $\mu\text{m}$ .

**Movie 2.** Live imaging of MDCK acinus expressing GFP-podocalyxin formed over 10 days of three-dimensional culture and treated at time T = 0 h with Rho activator II. Scale bar, 20  $\mu\text{m}$ .

**Movie 3.** Live imaging of MDCK acinus expressing GFP-podocalyxin formed over 10 days of three-dimensional culture and treated at time T = 0 h with Rho activator II. Scale bar, 20  $\mu\text{m}$ .

**Movie 4.** Live imaging of MDCK acinus expressing GFP-podocalyxin after 10 days of three-dimensional culture and treated at time T = 0 h with DMSO as vehicle control. Scale bar, 20  $\mu\text{m}$ .

**Movie 5.** Live imaging of MDCK acinus expressing GFP-H2B, emerald-occludin after 10 days of three-dimensional culture and treated at time T=0h with 1  $\mu\text{g/ml}$  Rho Activator II. Scale bar, 25  $\mu\text{m}$ .

**Movie 6.** 3D confocal scan of a single MDCK acinus expressing GFP-podocalyxin, treated with 1  $\mu\text{g/ml}$  Rho Activator II for 12 h.

**Movie 7.** Live imaging of a single acinus expressing mCherry-KASH1 and GFP-podocalyxin. Cells were cultured for 10 days in matrigel, then treated at T = 0 h with doxycycline to induce the expression of mCherry-KASH1. Scale bars, 20  $\mu\text{m}$ .

**Movie 8.** Live imaging of a single acinus expressing mCherry-KASH1 and GFP-podocalyxin. Cells were cultured for 10 days in matrigel, then treated at T = 0 h with doxycycline to induce the expression of mCherry-KASH1. Scale bar, 20  $\mu\text{m}$ .

**Movie 9.** Live imaging of a single acinus expressing mCherry-KASH1 and GFP-podocalyxin. Cells were cultured for 10 days in matrigel, then treated at T = 0 h with doxycycline to induce the expression of mCherry-KASH1. Scale bar, 20  $\mu\text{m}$ .

**Movie 10.** Live imaging of a single acinus expressing mCherry-KASH1 $\Delta$ PPPL and GFP-podocalyxin. Cells were cultured for 10 days in matrigel, then treated at T = 0 h with doxycycline to induce the expression of mCherry-KASH1 $\Delta$ PPPL. Scale bar, 20  $\mu\text{m}$ .

**Movie 11.** Live imaging of MDCK acinus expressing GFP-podocalyxin, after 7 days of three-dimensional culture and treated at time T=0 h with 8  $\mu\text{g/ml}$   $\beta$ -1 integrin function blocking antibody (A1B2). Scale bar, 20  $\mu\text{m}$ .

**Movie 12.** Live imaging of a single acinus assembled by 344SQ lung cancer cells treated with 1  $\mu\text{g/ml}$  of Rho activator II at 0 h. Scale bar is 50  $\mu\text{m}$ .

**Movie 13.** Live imaging of MDCK acinus expressing GFP-podocalyxin, after 7 days of three-dimensional culture where the acinus was laser ablated at T=0 h. Scale bar, 25  $\mu\text{m}$ .

**Movie 14.** Live imaging of MDCK acinus expressing GFP-podocalyxin, after 7 days of three-dimensional culture where the acinus was laser ablated at T=0 h. Scale bar, 25  $\mu\text{m}$ .
